## The Yin and Yang of regulatory T cells in immunotherapy

Yan Li and James P. Di Santo

In the recent decades, there has been a growing interest in harnessing the power of host immunity to fight against cancer. Advances in our understanding of immune mechanisms of tumor surveillance have dramatically improved the efficacy of immunotherapies. Nevertheless, severe toxicity becomes a prominent and shared 'feature' among many anti-tumor strategies. Administration of cytokines, such as IL-2, to patients represents one landmark in the development of cancer immunotherapies [1]. Remarkably, IL-2 therapy was shown to induce complete durable regressions in some cases of metastatic melanoma and renal carcinoma, prompting the U.S. Food and Drug Administration to approve high-dose IL-2 as an immunotherapy in 1992. While considerable progress has been made to increase the response rate to IL-2 therapy, severe toxicities limit IL-2 therapy to pre-selected 'healthy' patients.

To better understand the mechanisms underlying toxicity associated with IL-2 immunotherapy, we employed a human immune system (HIS) mouse model [2]. In HIS mice, multi-lineage human immune subsets are stably reconstituted following transfer of human hematopoietic stem cells to immunodeficient BALB/c *Rag2<sup>-/-</sup>Il2rg<sup>-/-</sup>Sirpa<sup>NOD</sup>* (BRGS) recipients. We found that dose-dependent morbidity and mortality of IL-2 therapy can be provoked in HIS mice after hydrodynamic injection of IL-2 encoding plasmids, but not in BRGS mice without human cells. This allowed us to dissect the contribution of individual human immune cells to IL-2 mediated toxicity *in vivo*. We showed that depletion of human T cells abolished toxicity, thus pointing to a central role of T cells in IL-2 mediated toxicity. Unexpectedly, we observed decreased percentages and function of regulatory T cells ( $T_{reg}$ ) in HIS mice after high-dose IL-2 therapy. This suggested that  $T_{reg}$  dysfunction might also be involved in IL-2 toxicity resulting in uncontrolled activation and proliferation of effector T cells ( $T_{eff}$ ). To test this hypothesis, we assessed whether depletion of  $T_{reg}$  or blocking of  $T_{reg}$  function would cause severe toxicity in HIS mice under low-dose IL-2 therapy, which is well tolerated in both patients and in HIS mice. In accordance with our hypothesis, interfering with  $T_{reg}$  function in low-dose IL-2 HIS mice provoked clinical and pathological signatures of high-dose IL-2 toxicity. In contrast, preserving  $T_{reg}$  function using the PIM-1 kinase inhibitor Kaempferol could ameliorate the toxicity associated with high-dose IL-2. Through modeling IL-2

toxicity in HIS mice, we have discovered a novel role for  $T_{reg}$  in modulating cytokine-mediated toxicity and challenge the prevalent notion that  $T_{reg}$  are detrimental for immunotherapy.

$T_{reg}$  are present in diverse tumor types and high ratios of tumor infiltrating  $T_{reg}$  to CD8 T cells are correlated with poor prognosis [3]. For patients with metastatic melanoma, high frequencies of circulating ICOS<sup>+</sup>  $T_{reg}$  predict poor response from high-dose IL-2 therapy [4]. Based on the evidence that  $T_{reg}$  dampens anti-tumor responses, novel optimized IL-2 therapies aim to limit  $T_{reg}$  stimulation using mutant IL-2 molecules or by coupling IL-2 with antibodies [5, 6]. These new IL-2 therapies favor expansion of  $T_{eff}$  over  $T_{reg}$  with the hope to augment antitumor responses. Our study, on the other hand, illustrates the essential role of  $T_{reg}$  in taming the serious autoimmunity associated with IL-2 administration. This finding should be considered when designing new strategies to improve the efficacy of immunotherapies. As tumor antigens are normal or mutated self-antigens, effective antitumor immunity often means breaking self-tolerance systemically or locally. Whether autoimmunity due to the loss of  $T_{reg}$  suppression in IL-2 therapy directly promote antitumor efficacy remains to be explored.

Immune checkpoint blockade, such as CTLA-4 and PD-1 antibodies, can provoke treatment-limiting side effects. CTLA-4 is a potent co-inhibitory marker expressed by  $T_{reg}$  as well as activated  $T_{eff}$  cells. The mechanism of CTLA-4 antibody was initially believed to be a blockade of CTLA-4 function on both  $T_{eff}$  and  $T_{reg}$ , but was later shown to be due to  $T_{reg}$  depletion [7]; a finding that we confirmed in HIS mice. Together, these studies demonstrate the value of HIS mice to help elucidate immune mechanisms associated with anti-cancer therapies. As such, HIS mice can be used as a preclinical platform to assess the efficacy and toxicity of novel checkpoint immunotherapies or combinational therapies for cancer.

**James P. Di Santo:** Innate Immunity Unit, Institut Pasteur, Paris, France; Inserm, Paris, France

**Correspondence to:** James P. Di Santo, **email** james.di-santo@pasteur.fr

**Keywords:** humanized mice; cancer immunotherapy; regulatory T cells; IL-2 induced toxicity

**Received:** December 23, 2017

**Published:** February 03, 2018

## REFERENCES

1. Rosenberg SA, et al. *J Immunol.* 2014; 192:5451-5458.
2. Li Y, et al. *Nat Commun.* 2017; 8:1762.
3. Tanaka A, et al. *Cell Res.* 2017; 27:109-118.
4. Sim GC, et al. *J Clin Invest.* 2014; 124:99-110.
5. Spangler JB, et al. *Immunity.* 2015; 42:815-825.
6. Levin AM, et al. *Nature.* 2012; 484:529-533.
7. Simpson TR, et al. *J Exp Med.* 2013; 210:1695-1710.

**Copyright:** Li et al. This is an open-access article distributed under the terms of the Creative Commons Attribution License 3.0 (CC BY 3.0), which permits unrestricted use, distribution, and reproduction in any medium, provided the original author and source are credited.
